1 Measuring the gut microbiome in birds:  
2 comparison of faecal and cloacal sampling  
3  
4  
5

6 **Authors**

7 Elin Videvall<sup>1</sup>, Maria Strandh<sup>1</sup>, Anel Engelbrecht<sup>2</sup>, Schalk Cloete<sup>2</sup>, Charlie K. Cornwallis<sup>1</sup>  
8

9 **Affiliation**

10 <sup>1</sup>Department of Biology, Lund University, Sölvegatan 37, SE-22362 Lund, Sweden

11 <sup>2</sup>Directorate Animal Sciences, Western Cape Department of Agriculture, Private Bag X1, Elsenburg,  
12 South Africa  
13

14 **Corresponding author**

15 Elin Videvall ([elin.videvall@biol.lu.se](mailto:elin.videvall@biol.lu.se))

## 16 **Abstract**

17

18

19 The gut microbiomes of birds and other animals are increasingly being studied in ecological and  
20 evolutionary contexts. While methods for preserving samples and processing high-throughput  
21 sequence data to characterise bacterial communities have received considerable attention, there has  
22 been little evaluation of non-invasive sampling methods. Numerous studies on birds and reptiles have  
23 made inferences about gut microbiota using cloacal sampling, however, it is not known whether the  
24 bacterial community of the cloaca provides an accurate representation of the avian gut microbiome.  
25 We examined the accuracy with which cloacal swabs and faecal samples measure the microbiota in  
26 three different parts of the gastrointestinal tract (ileum, caecum, and colon) using a case study on  
27 juvenile ostriches, *Struthio camelus*, and high-throughput 16S rRNA sequencing. We found that  
28 faeces were significantly better than cloacal swabs in representing the bacterial community of the  
29 colon. Cloacal samples had a higher abundance of Gammaproteobacteria and fewer Clostridia relative  
30 to the gut and faecal samples. However, both faecal and cloacal samples were poor representatives of  
31 the microbial communities in the caecum and ileum. Furthermore, the accuracy of the sampling  
32 methods in measuring the abundance of different bacterial taxa was highly variable: Bacteroidetes  
33 was the most highly correlated phylum between all three gut sections and both methods, whereas  
34 colonic Actinobacteria correlated strongly only with faecal samples. This study demonstrates that  
35 sampling methods can have significant effects on the inferred gut microbiome in studies of birds.  
36 Based on our results, we recommend sampling faeces, whenever possible, as this provides the most  
37 accurate assessment of the colon microbiome. The fact that neither sampling technique portrayed the  
38 bacterial community of the ileum or the caecum illustrates the difficulty in non-invasively monitoring  
39 gut bacteria located further up in the gastrointestinal tract. These results have important implications  
40 for the interpretation of avian gut microbiome studies.

## 41 Introduction

42

43

44 The community of bacteria harboured within the gastrointestinal tract of animals – ‘the gut  
45 microbiome’ – has been established as an important determinant of host health and physiology  
46 (Sekirov *et al.* 2010). Although research has largely focused on humans and model organisms, it is  
47 becoming increasingly recognised that the gut microbiome may play an important role in a variety of  
48 ecological and evolutionary processes, as it has been associated with disease resistance, behaviour,  
49 mate selection, longevity, and adaptation (Sharon *et al.* 2010; Koch & Schmid-Hempel 2011; Muegge  
50 *et al.* 2011; Ezenwa *et al.* 2012; Brooks *et al.* 2016; Smith *et al.* 2017). As a result, it is necessary that  
51 accurate methods for monitoring the gut microbiome in ecologically relevant contexts are developed.  
52 To date, multiple studies have focused on the reliability of methods for storing and preserving  
53 samples, as well as techniques for processing data from high-throughput sequencing (see e.g.,  
54 Debelius *et al.* 2016; Song *et al.* 2016). However, it remains unclear whether different sampling  
55 techniques accurately represent the bacterial communities in different parts of the gastrointestinal  
56 tract.

57 A large number of studies investigating the gut microbiome of birds and reptiles have  
58 sampled bacteria from the cloaca (Bowman & Jacobson 1980; Cooper *et al.* 1985; Lombardo *et al.*  
59 1996; D’Aloia *et al.* 1996; Mills *et al.* 1999; Dickinson *et al.* 2001; Lamberski *et al.* 2003; Moreno *et al.*  
60 2003; Lucas & Heeb 2005; Maul *et al.* 2005; Santoro *et al.* 2006; Hoar *et al.* 2007; Klomp *et al.*  
61 2008; Ruiz-Rodríguez *et al.* 2009a; b; Martin *et al.* 2010; Xenoulis *et al.* 2010; Santos *et al.* 2012;  
62 Charruau *et al.* 2012; Dewar *et al.* 2013, 2014; van Dongen *et al.* 2013; Stenkat *et al.* 2014; Allegretti  
63 *et al.* 2014; Matson *et al.* 2015; Stanley *et al.* 2015; Kreisinger *et al.* 2015; Barbosa *et al.* 2016;  
64 Merkevicene *et al.* 2017; Lobato *et al.* 2017; Ganz *et al.* 2017). Cloacal sampling is widely used  
65 because it is straightforward to perform, allows repeated sampling of individuals, and the possibility  
66 of reliably obtaining samples from all individuals at the same time. This can provide practical  
67 advantages over faecal sampling, which may be unreliable and provides potential difficulties in  
68 identifying sample ownership and time of defecation.

69 It is, however, not known if the microbiota of the cloaca provides an accurate reflection of the  
70 bacterial community in the gut, and whether cloacal sampling is a good alternative method to faecal  
71 sampling. From a theoretical point of view, there are reasons to believe that the bacterial community  
72 of the cloaca is not simply seeded with bacteria from faeces. The cloaca constitutes the single  
73 posterior opening for the digestive, reproductive, and urinary tract in birds, reptiles, amphibians,  
74 sharks, rays, and a few mammals, and as such represents an important barrier to foreign bodies,  
75 including pathogens. For example, during copulation, many bird species engage in a so-called  
76 “cloacal kiss”, where they exchange not only sperm, but also cloacal microbes (Kulkarni & Heeb  
77 2007; White *et al.* 2010). In fact, the avian cloaca has a specialised immune organ, the bursa of  
78 Fabricius, that is involved in the development of B lymphocytes and antibody production (Warner &  
79 Szenberg 1964), and enables contact between cloacal microbes and the lymphoid system (Schaffner *et al.*  
80 1974). Furthermore, the cloacal mucosa likely constitutes an environment that is mostly aerobic  
81 compared to the anaerobic environment of the gastrointestinal lumen, as this is the case for the  
82 mammalian rectum (Albenberg *et al.* 2014; De Weirdt & Van de Wiele 2015). Taken together, the

83 proximity of the mucosal cloacal microbiome to both the external environment and host tissue,  
84 including secreted mucus with immune cells and antimicrobial molecules, likely results in a microbial  
85 environment different from that of the gut, and potentially therefore structural differences in  
86 microbiota. Nevertheless, several studies investigating bacterial gut composition in birds directly refer  
87 to cloacal swabs as faecal samples, with the assumption that they are equivalent (Dewar *et al.* 2013,  
88 2014; Allegretti *et al.* 2014; Stanley *et al.* 2015).

89 In line with the idea that the cloaca may accommodate different bacteria, two studies  
90 evaluating cloacal swabs with caecal samples in chickens found large differences in bacterial  
91 communities (Stanley *et al.* 2015; Zhang *et al.* 2017). It has been argued, however, that cloacal  
92 samples may still reflect the presence of the vast majority of caecal bacteria if they are sequenced  
93 deep enough (Stanley *et al.* 2015), and it is unclear whether faecal sampling would provide a more  
94 accurate picture. This raises the issue of whether particular sampling techniques are superior at  
95 measuring specific groups of bacteria in the gut microbiome. For example, certain bacterial taxa may  
96 be more widely distributed along the gastrointestinal tract and hence easier to monitor, while other  
97 taxa may be confined to specific locations in the gut and thus not well represented by any sampling  
98 method. Uncovering what attributes of the gut microbiome different types of sampling methods are  
99 able to measure, and what they can infer about the microbial communities present in the different  
100 sections of the intestinal tract will be essential to advance our understanding of host microbiomes.

101 In this study we evaluate the accuracy of two commonly used microbiome sampling  
102 techniques for birds: cloacal swabs and faecal samples. We test the similarity of the cloacal and faecal  
103 microbiomes to three parts of the gastrointestinal tract: ileum, caecum, and colon. For this purpose, 20  
104 juvenile ostriches between four to six weeks old were used as a case study.

## 105 **Materials and methods**

106

107

### 108 *Study species*

109 We used the ostrich, *Struthio camelus*, as case study species, kept under controlled conditions at the  
110 Western Cape Department of Agriculture ostrich research facility in Oudtshoorn, South Africa. The  
111 samples in this study were obtained in 2014 from a total of 20 juveniles, which included ten  
112 individuals four weeks old and ten individuals six weeks old. Ostrich chicks can easily be maintained  
113 and handled in an experimental setting, and this specific age group is ideal in size and temperament  
114 for both faecal sampling and dissection, allowing us to efficiently retrieve all necessary samples in a  
115 standardised way. The chicks were housed and reared with their contemporaries in four separate  
116 groups in indoor pens in the same building, containing approximately 35-40 individuals in each group  
117 at the time of sampling. During the daytime they had access to outside enclosures where they could  
118 peck freely in soil, and were given ad libitum access to fresh water and food throughout the trial.

119

120

### 121 *Sample collection*

122 Faecal samples were collected from all chicks one day before scheduled euthanization and dissection,  
123 by placing sterile plasters over their cloaca and retrieving the collected fresh faeces approximately one  
124 hour later. Two to three chicks were randomly selected from each group for gut sampling, totalling  
125 ten individuals per sampling event, one at four weeks of age and one at six weeks. Before dissection,  
126 the 20 randomly selected chicks were euthanized by a licensed veterinarian who severed the carotid  
127 artery. All procedures were approved by the Departmental Ethics Committee for Research on Animals  
128 (DECRA) of the Western Cape Department of Agriculture, reference number R13/90. During the  
129 dissection we collected four samples from each individual: cloacal swabs and samples from the ileum,  
130 caecum, and colon. Cloacal samples were collected by using sterile cotton swabs that were briefly  
131 moistened in phosphate-buffered saline (PBS), and the tip carefully inserted in the cloaca of the birds  
132 and gently rotated.

133 To minimize contamination between samples and individuals, a number of precautions were  
134 taken. Lab benches and surfaces were routinely sterilized with 70% ethanol, and equipment used  
135 during the dissection was first cleaned with hot water, then rinsed with 70% ethanol and subsequently  
136 placed in the open flame of a Bunsen burner between each sample collection for sterilization. Control  
137 swabs were collected during both dissection events and during the faecal sampling. The control swabs  
138 followed the same initial procedure as the cloacal swabs (dipping sterile cotton swabs in PBS), but  
139 instead of sampling the bird, they were exposed to potential microbes in the air by waving the wet  
140 swab around in the dissection/sampling room. All samples were collected in plastic 2 ml micro tubes  
141 (Sarstedt, cat no. 72.693) between October 28 and November 12, 2014, and stored at -20 °C within  
142 two hours of collection. They were subsequently transported on ice to a laboratory and stored at -20  
143 °C.

144

145

146 *DNA isolation, library preparation, and amplicon sequencing*

147 We prepared sample slurries for all sample types with guidance from Flores *et al.* (2012) and  
148 subsequently extracted DNA using the PowerSoil-htp 96 well soil DNA isolation kit (MoBio  
149 Laboratories, cat no. 12955-4) as recommended by the Earth Microbiome Project  
150 ([www.earthmicrobiome.org](http://www.earthmicrobiome.org)) (for full details please see Supplementary Methods available online).  
151 Libraries for sequencing of the 16S rRNA V3 and V4 regions were prepared using the primers  
152 Bakt\_341F and Bakt\_805R (Herlemann *et al.* 2011) according to the Illumina 16S Metagenomic  
153 Sequencing Library Preparation Guide (Part # 15044223 Rev.B). All samples in this study (Table S1)  
154 were sequenced in one 300-bp paired end run on an Illumina MiSeq platform at the DNA Sequencing  
155 Facility, Department of Biology, Lund University, Sweden. In a subsequent run, we sequenced blank  
156 samples and additional control samples that were collected during the trial for a related project. These  
157 control samples were not essential for this particular study, but were included to increase the number  
158 of controls. As a result, a total of 117 different samples plus 54 sample replicates (see Supplementary  
159 Methods) were part of this study.

160

161

162 *Data processing*

163 The 16S amplicon sequences were quality controlled using FastQC (v. 0.11.5) (Andrews 2010)  
164 together with MultiQC (Ewels *et al.* 2016). Primers were removed from the sequences using  
165 Trimmomatic (v. 0.35) (Bolger *et al.* 2014) and the forward reads were retained for analyses. Quality  
166 filtering of the reads were executed using the script `multiple_split_libraries_fastq.py` from QIIME (v.  
167 1.9.1) (Caporaso *et al.* 2010). All bases with a Phred score < 25 at the 3' end of reads were trimmed  
168 and samples were multiplexed into a single high-quality multi-fasta file.

169 Operational taxonomic units (OTUs) were assigned and clustered using Deblur (v. 1.0.0)  
170 (Amir *et al.* 2017). Deblur circumvents the problems surrounding clustering of OTUs at an arbitrarily  
171 threshold by obtaining single-nucleotide resolution OTUs after correcting for Illumina sequencing  
172 errors. This results in exact sequence variants (ESVs), also called amplicon sequence variants (ASVs),  
173 oligotypes, and sub-OTU (sOTUs). In order to avoid confusion, we chose to call these units OTUs,  
174 but the reader should be aware that they differ from the traditional 97% clustering approach (Callahan  
175 *et al.* 2017). The minimum reads-option was set to 0 to disable filtering inside Deblur, and all  
176 sequences were trimmed to 220 bp. We used the biom table produced after both positive and negative  
177 filtering, which by default removes any reads which contain PhiX or adapter sequences, and only  
178 retains sequences matching known 16S sequences. Additionally, PCR-originating chimeras were  
179 filtered from reads inside Deblur (Amir *et al.* 2017).

180 Taxonomic assignment of OTUs was performed using the Greengenes database (DeSantis *et al.*  
181 *et al.* 2006). We filtered all samples on a minimum read count of 1000 sequences, resulting in three out  
182 of 171 samples being excluded (one ileum and two control samples). We further filtered all OTUs that  
183 only appeared in one sample, resulting in the removal of 8,846 OTUs, with 3,015 remaining. The  
184 samples with technical replicates (two control samples and seven individuals with replicates for all  
185 sample types; see Supplementary Methods) had the replicates merged within their respective sample

186 type (i.e. ileum.rep1 + ileum.rep2) to increase the amount of valuable sequence information. The  
187 analyses were evaluated with both rarefied and non-rarefied data, which produced extremely similar  
188 and comparable results. We therefore present the results from the non-rarefied data in this study, as  
189 recommended by McMurdie & Holmes (2014).

190  
191

## 192 *Data analyses*

193 All analyses were performed in R (v. 3.3.2) (R Core Team 2017). We calculated alpha diversity using  
194 the Shannon measure with absolute abundance of reads, and distance measures with the Bray-Curtis  
195 distance method on relative read abundances in phyloseq (v. 1.19.1) (McMurdie & Holmes 2013).  
196 Differences between the microbiota of cloacal and faecal samples to the microbiota of each gut  
197 section were examined using permutational multivariate analysis of variances (PERMANOVA) on  
198 Bray-Curtis distances using the Adonis function in vegan (v. 2.4-2) with 1000 permutations (Oksanen  
199 *et al.* 2017). To analyse if there were differences in the variance (dispersion) between sample types,  
200 we used the multivariate homogeneity of group dispersions test (betadisper) in vegan (Oksanen *et al.*  
201 2017), followed by the Tukey's 'Honest Significant Difference' method. Blank and control samples  
202 showed highly dissimilar microbial composition to all other sample types (see Figures S1, S2, S3, and  
203 S4) and were not included in any further analyses.

204 To evaluate bacterial abundances, we first filtered out all OTUs with less than 10 sequence  
205 reads and then, using DESeq2 (v. 1.14.1), counts were modelled with a local dispersion model and  
206 normalised per sample using the geometric mean (see the DESeq2 manual) (Love *et al.* 2014). We  
207 examined the strength of the correlations between the abundance of bacteria (normalised OTU  
208 abundance), both at the level of phylum and class, in the three parts of the gut in relation to the  
209 abundances in both cloacal swabs and faecal samples. Two sets of correlations were performed, one  
210 where each data point represented the mean number of OTUs in that bacterial taxon averaged across  
211 the 20 individuals ('correlations across bacteria', n = number of OTUs per bacteria phylum or class)  
212 and one set of correlations where each data point represented the abundance of a bacterial taxon per  
213 individual ('correlations across individuals', n = 20). We used Spearman's rank-order correlation and  
214 tested the differences between correlations obtained for cloacal samples and those from faecal  
215 samples using cocor (v. 1.1-3) (Diedenhofen & Musch 2015).

216 Differential abundances between sample types were subsequently tested in DESeq2 with a  
217 negative binomial Wald test using individual ID as factor and with the beta prior set to false (Love *et al.*  
218 *et al.* 2014). The results for specific comparisons were extracted (e.g. faeces versus ileum) and p-values  
219 were corrected with the Benjamini and Hochberg false discovery rate for multiple testing. OTUs were  
220 labelled significant if they had a corrected p-value (q-value) < 0.01. Plots were made using phyloseq  
221 (McMurdie & Holmes 2013) and ggplot2 (Wickham 2009).

## 222 Results

223

224

### 225 *Overall microbiome composition in different sample types*

226 First, we evaluated the overall pattern of the microbial community reflected by the two sampling  
227 techniques (cloacal swabs and faeces) and the three different sections of the avian gastrointestinal  
228 tract (Figure 1). The abundance of bacterial taxa in the microbiomes of the caecum, colon, and faeces  
229 showed large overall similarities (Figures 1C, 1D), especially the faecal and colon samples which  
230 closely clustered in the network plot (Figure 1B). These three sample types also had the highest and  
231 most similar alpha diversity values (colon mean Shannon's diversity index  $H = 4.47$ , faeces  $H = 4.25$ ,  
232 and caecum  $H = 4.16$ ; Figure 1A). Bacteria from the classes Clostridia (phylum: Firmicutes) and  
233 Bacteroidia (phylum: Bacteroidetes) mainly dominated in the caecum, colon, and faeces (Figures 1C,  
234 1D). In contrast, the cloacal and ileum samples showed large overall taxa dissimilarities in microbiota  
235 composition compared to the other samples types (Figure 1). The microbiome of the cloaca had  
236 significantly lower alpha diversity compared to the caecum, colon, and faeces ( $H = 3.40$ , paired  
237 Wilcoxon signed rank test against caecum:  $V = 37$ ,  $p = 0.009$ ; against colon:  $V = 4$ ,  $p < 0.0001$ , and  
238 against faeces:  $V = 17$ ,  $p = 0.0004$ ), and so did the ileum ( $H = 2.50$ , pairwise comparisons against  
239 caecum, colon, and faeces:  $V = 0$ ,  $p < 0.0001$ ). The cloaca showed a distinct microbial community  
240 from all other samples at the class level with a high relative abundance of Gammaproteobacteria and  
241 Bacilli, and a lower abundance of Clostridia (Figures 1C, 1D). The ileum also showed higher  
242 abundance of Bacilli and lower abundance of Clostridia, but was overall dissimilar to all other  
243 samples with a high representation of Betaproteobacteria and very few Bacteroidia (Figures 1C, 1D).

244

245

### 246 *Distances between the microbiomes of the cloaca and faeces to the gut sections*

247 Second, to evaluate overall microbiota distance dissimilarities between the two sample methods to the  
248 gut samples, we conducted multivariate analyses of variance (Adonis). All comparisons were  
249 significantly different from each other (PERMANOVA:  $p < 0.001$ ), indicating that each sample type  
250 harbours a unique microbiome. This was due to differences in mean distances between communities,  
251 not differences in variances, as there was no difference in dispersion between sample types  
252 (multivariate homogeneity test of group dispersions: adjusted  $p > 0.152$ ). The two most similar  
253 sample types were the faeces and colon, which resulted in a low  $R^2$  (0.069), whereas the cloaca and  
254 colon were more dissimilar ( $R^2 = 0.099$ ). Both sampling methods reflected greater dissimilarities to  
255 the gut sections further up in the gastrointestinal tract, with faecal samples being more distant to the  
256 caecum ( $R^2 = 0.191$ ) and the ileum ( $R^2 = 0.160$ ), as were cloacal samples (caecum:  $R^2 = 0.136$ , ileum:  
257  $R^2 = 0.145$ ).

258 To directly test how well cloacal swabs and faecal samples represented the microbiota in the  
259 gut, we calculated community Bray-Curtis distances between the faecal and cloacal samples to each  
260 of the three sections of the gut for each individual (Figure 2). Neither sampling technique was  
261 particularly good at measuring the microbiome of the ileum (cloacal mean distance = 0.87, faecal



262 mean distance = 0.84, paired Wilcoxon signed rank test:  $V = 136$ ,  $p = 0.104$ ) or the caecum (cloacal  
263 mean distance = 0.82, faecal mean distance = 0.84,  $V = 88$ ,  $p = 0.546$ ). However, the faecal samples  
264 were significantly closer in distance to the colon than the cloacal samples were (cloacal mean distance  
265 = 0.74, faecal mean distance = 0.63,  $V = 164$ ,  $p = 0.027$ ) (Figure 2).

266  
267

### 268 *Correlation of bacterial abundances in the cloaca and faeces with the gut sections*

269 We further evaluated how accurately the sampling techniques represented the abundance of  
270 all OTUs in the ileum, caecum, and colon, and found that the correlations of both faecal and cloacal  
271 samples with the ileum and caecum were weak ( $r = 0.045$ – $0.268$ ; Figure 3). Conversely, the  
272 correlations with the colon were strong, especially for the faecal samples ( $r = 0.558$  versus  $r = 0.476$   
273 for cloacal swabs; Figure 3). When analysing the abundances of different bacterial phyla separately,  
274 we again found that the correlations between the sampling methods and the ileum were weak for all  
275 six phyla ( $r < 0.275$ ; Table S2). The phyla abundance correlations were stronger for the colon ( $r =$   
276  $0.246$ – $0.803$ ; Table S2), but highly variable for the caecum ( $r = -0.127$ – $0.633$ ; Table S2). Similar  
277 patterns of correlation were also found when analysing abundances across different bacterial classes  
278 (Table S3). More specifically, the phylum Bacteroidetes had the strongest correlations between both  
279 sampling methods and each of the three gut sections (Table S2), and at a lower taxonomic level, the  
280 two classes Bacteroidia (phylum: Bacteroidetes) and Coriobacteriia (phylum: Actinobacteria)  
281 displayed strong correlations between each of the two sampling techniques to both the caecum and  
282 colon (Table S3). Overall, the correlations between faecal samples and cloacal swabs to the different  
283 parts of the gut were similar with a few exceptions. For example, the abundance of Actinobacteria in  
284 the colon and caecum appeared to be better represented in faeces, whereas the abundance of  
285 Tenericutes and Betaproteobacteria in the same intestinal regions appeared to be better represented in  
286 cloacal swabs.

287 In addition, we examined how well the abundances of different bacteria correlated between  
288 samples from the same host individuals (Figure S4). Overall OTU abundance in the ileum was weakly  
289 correlated with faeces ( $r = 0.162$ ), but more strongly with cloacal swabs ( $r = 0.493$ ). In contrast,  
290 individual faecal samples showed extremely high correlations to both the caecum ( $r = 0.872$ ) and the  
291 colon ( $r = 0.893$ ), whereas cloacal samples only showed intermediate correlations to the caecum ( $r =$   
292  $0.509$ ) and colon ( $r = 0.538$ ) (Figure S4).

293  
294

### 295 *Differences in abundance of specific OTUs in the cloaca and faeces versus the gut sections*

296 Next, we analysed whether specific OTUs were more or less abundant when using either of the two  
297 sampling techniques by testing for significant differences ( $q < 0.01$ ) in OTU abundance in the cloacal  
298 and faecal samples compared to the three gut sections (Figure 4; Tables S4-S9). Consistent with our  
299 previous analyses, we found the highest number of significantly different OTUs when comparing the  
300 ileum to both the faecal ( $n = 307$ ) and cloacal samples ( $n = 250$ ), followed by the comparisons with  
301 the caecum (144 significant OTUs for faeces versus 123 for cloacal swabs). The colon showed the  
302 least differences in abundance to both sampling methods, but the cloacal samples had twice as many

303 significant OTUs (n = 64) compared to faecal samples (n = 32), indicating substantially more  
304 differences between cloaca-colon than faeces-colon (Tables S8-S9).

305 We further evaluated the taxa that showed significantly different abundances across the six  
306 sample comparisons. Relative to the ileum, a large number of OTUs in the phylum Firmicutes were  
307 significantly more abundant in both faeces and the cloaca (Figure 4; Tables S4-S5). The most  
308 significant Firmicutes families included Ruminococcaceae, Lachnospiraceae, Erysipelotrichaceae,  
309 Clostridiaceae, and Christensenellaceae (Tables S4-S5). The Enterobacteriaceae (Proteobacteria), the  
310 Verrucomicrobiaceae (Verrucomicrobia), and several families within the Bacteroidetes were also  
311 significantly more abundant in both faeces and the cloaca compared to the ileum. When comparing  
312 sampling methods against the caecum, several Firmicutes bacteria showed significantly different  
313 abundances in both directions (Figure 4). The caecum showed, however, a significantly higher  
314 abundance of Bacteroidetes relative to both the cloaca and faeces, with one exception: an OTU within  
315 the Rikenellaceae, which was completely absent in the caecum samples but present in both sampling  
316 methods. Interestingly, the cloaca had a lot more significantly different Proteobacteria OTUs (n = 19)  
317 than faeces did (n = 2) in the comparison with the caecum, and 94.7% of those were more abundant in  
318 the cloacal samples (Figure 4; Tables S6-S7). Finally, the comparison between the colon and faeces  
319 only resulted in 13 significantly different bacterial families within five phyla, while the difference  
320 between the colon and cloaca was much larger and phylogenetically broader, representing 28  
321 significantly different families from 11 phyla (Figure 4; Tables S8-S9).

## 322 Discussion

323

324

325 Measuring the gut microbiome of birds and other animals is becoming increasingly important for  
326 ecologists and evolutionary biologists due to its potential implications for host fitness. Numerous  
327 studies sample either the cloacae or faeces of birds as a proxy for estimating the bacterial community  
328 in the gut, however, it has remained untested whether cloacal or faecal sampling constitute accurate  
329 ways of measuring avian gut bacteria. In this study we examined the microbiota of cloacal swabs and  
330 faeces and compared them to the microbiota in three different sections of the gastrointestinal tract. We  
331 found that cloacal swabs were less accurate at representing the microbiome of the colon relative to  
332 faecal samples, which had more similar community composition and abundances of bacteria. Neither  
333 faeces nor cloacal swabs could, however, accurately estimate the bacterial communities of the ileum  
334 and the caecum. These results have important implications for the interpretation of bird gut  
335 microbiomes, and we hope they will aid researchers in the planning of future studies.

336 The different sections of the gastrointestinal tract were associated with spatial heterogeneity  
337 in their bacterial composition, which is largely expected given their different physiological functions.  
338 The ileum is the final part of the small intestine and has a primary role of absorbing nutrients from  
339 food while maintaining a neutral pH. In our study, the ileal microbiome had the lowest alpha  
340 diversity, which is consistent with other studies investigating the small intestine of birds and reptiles  
341 (Bjerrum *et al.* 2006; Danzeisen *et al.* 2015; Kohl *et al.* 2017). It also had the highest relative  
342 abundance of Bacilli and Betaproteobacteria compared to the other sample types. The second sample  
343 site of the gastrointestinal tract, the caecum, provides important functions by breaking down plant and  
344 fibrous material, and birds typically have two caeca, located between the small and large intestines.  
345 Although the caecal samples in our study were dissimilar to other sample types, they most closely  
346 clustered with samples from the colon, at least at higher taxonomic levels. Both of these intestinal  
347 regions had high abundances of Clostridia and Bacteroidia. In comparison to both faecal and cloacal  
348 samples, the caecum had a significantly higher abundance of several Bacteroidetes, similar to  
349 previous research on the chicken caecum (Stanley *et al.* 2015). The final part of the intestinal tract, the  
350 colon, has a primary function to absorb water and salt from ingested material. The colon samples in  
351 our study had the highest alpha diversity of all sample types and the strongest taxa correlations to both  
352 sampling methods, although significantly better to faeces than to the cloaca.

353 The similarities of both the cloacal and faecal microbiota to that of the gut increased the  
354 further down the gastrointestinal tract we sampled, as perhaps expected given the proximity to the  
355 cloaca. Nevertheless, there was substantial variation in how well bacterial abundances in different  
356 parts of the gut correlated with faecal and cloacal samples across different taxonomic groups, both  
357 when examining across individual OTUs and across individual hosts. This variation does not appear  
358 to be simply explained by differences in the total abundance of different bacteria (e.g. more abundant  
359 bacteria might be more widely distributed in the gut and so more strongly correlated across samples),  
360 as some classes of bacteria had high numbers of OTUs, but were poorly correlated and vice versa  
361 (Table S3). The strength of correlations between different sample types may potentially reflect the  
362 fact that different bacteria vary markedly in the environmental conditions they can tolerate, and hence  
363 the breadth of their spatial distribution in the gut. The causes underlying this variation require further

364 investigation, but by presenting effect sizes of the strength of associations we hope to provide useful  
365 information on which bacteria can reliably be monitored in different locations of the gastrointestinal  
366 tract (Tables S2-S3).

367 A common goal of microbiome studies, particularly in ecological contexts, is to understand  
368 how gut bacteria relate to phenotypic variation. Because it is not feasible to collect intestinal samples  
369 in wild birds without highly invasive techniques, faecal or cloacal samples are often the only option,  
370 especially if repeated sampling is required. Our results suggest that the bacterial communities in the  
371 upper and middle gastrointestinal tract are distinct from those recovered by non-invasive sampling  
372 methods, and as such, any inferences made about the gut microbiome and its relationship to  
373 phenotypic variation may only be possible for processes occurring in the colon. Further studies are  
374 needed to investigate if the results of this study hold true for other animals with cloacae, such as frogs,  
375 lizards, and egg-laying mammals. Most mammals possess a rectum instead of a cloaca, which differs  
376 in both function and physiology, and rectal swabs are therefore likely to differ substantially to cloacal  
377 swabs in the degree to which they are useful for monitoring gut microbiomes. The current evidence as  
378 to whether rectal swabs constitute a representative sampling method of the gut microbiome of  
379 mammals is conflicting and suffers from low sample sizes, thus warranting additional evaluation  
380 (Budding *et al.* 2014; Alfano *et al.* 2015; Bassis *et al.* 2017).

381 In conclusion, for gut microbiome sampling of birds, we recommend faecal samples  
382 whenever possible, as this sampling procedure best captured the bacterial community of the colon.

## 383 **Acknowledgements**

384

385

386 We are grateful to all the staff at the Oudtshoorn Research Farm, Western Cape Government and  
387 Naomi Serfontein, Maud Bonato, and Julian Melgar for assisting during the collection of samples.  
388 Adriaan Olivier, Klein Karoo International, generously provided instructions on dissection and  
389 performed euthanization of chicks. Thomas Johansson performed the sequencing and Paul McMurdie,  
390 Michiel Op De Beeck, Se Jin Song, and Amnon Amir provided valuable advice on analyses. This  
391 research was partially funded by research grants to E.V. from the Helge Ax:son Johnson Foundation,  
392 the Långmanska Cultural Foundation, the Lund Animal Protection Foundation, the Lars Hierta  
393 Memorial Foundation, and the Royal Physiographic Society of Lund. It was further funded by a  
394 Wallenberg Academy Fellowship and VR grant to C.K.C. and by the Western Cape Government.

395

396

## 397 **Author contributions**

398

399

400 Study design was planned by E.V. and C.K.C. Sample collection was performed by E.V., C.K.C., and  
401 A.E. Animal facilities were provided by S.C., and supervised by A.E. The laboratory work was  
402 planned and performed by M.S. The analyses were performed by E.V. with C.K.C. assisting. E.V.  
403 wrote the paper with input from all authors.

## 404 **References**

405

406

407 Albenberg L, Esipova T V, Judge CP *et al.* (2014) Correlation between intraluminal oxygen gradient  
408 and radial partitioning of intestinal microbiota. *Gastroenterology*, **147**, 1055–1063.e8.

409 Alfano N, Courtiol A, Vielgrader H *et al.* (2015) Variation in koala microbiomes within and between  
410 individuals: effect of body region and captivity status. *Scientific Reports*, **5**, 10189.

411 Allegretti L, Revolledo L, Astolfi-Ferreira CS *et al.* (2014) Isolation and molecular identification of  
412 lactic acid bacteria and *Bifidobacterium* spp. from faeces of the blue-fronted Amazon parrot in  
413 Brazil. *Beneficial Microbes*, **5**, 497–503.

414 Amir A, McDonald D, Navas-Molina JA *et al.* (2017) Deblur Rapidly Resolves Single-Nucleotide  
415 Community Sequence Patterns. *mSystems*, **2**, e00191-16.

416 Andrews S (2010) FastQC: A quality control tool for high throughput sequence data.

417 <http://www.bioinformatics.babraham.ac.uk/projects/fastqc/>.

418 Barbosa A, Balagué V, Valera F *et al.* (2016) Age-Related Differences in the Gastrointestinal  
419 Microbiota of Chinstrap Penguins (*Pygoscelis antarctica*). *PLOS ONE*, **11**, e0153215.

420 Bassis CM, Moore NM, Lolans K *et al.* (2017) Comparison of stool versus rectal swab samples and  
421 storage conditions on bacterial community profiles. *BMC Microbiology*, **17**, 78.

422 Bjerrum L, Engberg RM, Leser TD *et al.* (2006) Microbial Community Composition of the Ileum and  
423 Cecum of Broiler Chickens as Revealed by Molecular and Culture-Based Techniques. *Poultry  
424 Science*, **85**, 1151–1164.

425 Bolger AM, Lohse M, Usadel B (2014) Trimmomatic: A flexible trimmer for Illumina sequence data.  
426 *Bioinformatics*, **30**, 2114–2120.

427 Bowman TA, Jacobson ER (1980) Cloacal Flora of Clinically Normal Captive Psittacine Birds.  
428 *Journal of Zoo Animal Medicine*, **11**, 81–85.

429 Brooks AW, Kohl KD, Brucker RM, van Opstal EJ, Bordenstein SR (2016) Phylosymbiosis:  
430 Relationships and Functional Effects of Microbial Communities across Host Evolutionary  
431 History. *PLOS Biology*, **14**, e2000225.

432 Budding AE, Grasman ME, Eck A *et al.* (2014) Rectal Swabs for Analysis of the Intestinal  
433 Microbiota. *PLOS ONE*, **9**, e101344.

434 Callahan BJ, McMurdie PJ, Holmes SP (2017) Exact sequence variants should replace operational  
435 taxonomic units in marker gene data analysis. *bioRxiv*. doi: 10.1101/113597.

436 Caporaso JG, Kuczynski J, Stombaugh J *et al.* (2010) QIIME allows analysis of high-throughput  
437 community sequencing data. *Nature Methods*, **7**, 335–336.

438 Charruau P, Pérez-Flores J, Pérez-Juárez JG, Cedeño-Vázquez JR, Rosas-Carmona R (2012) Oral and  
439 cloacal microflora of wild crocodiles *Crocodylus acutus* and *C. moreletii* in the Mexican  
440 Caribbean. *Diseases of Aquatic Organisms*, **98**, 27–39.

441 Cooper JE, Needham JR, Lawrence K (1985) Studies on the cloacal flora of three species of free-  
442 living British reptile. *Journal of Zoology*, **207**, 521–525.

443 D'Aloia MA, Bailey TA, Samour JH, Naldo J, Howlett JC (1996) Bacterial flora of captive houbara  
444 (*Chlamydotis undulata*), kori (*Ardeotis kori*) and rufous-crested (*Eupodotis ruficrista*) bustards.  
445 *Avian Pathology*, **25**, 459–468.

- 446 Danzeisen JL, Clayton JB, Huang H *et al.* (2015) Temporal Relationships Exist Between Cecum,  
447 Ileum, and Litter Bacterial Microbiomes in a Commercial Turkey Flock, and Subtherapeutic  
448 Penicillin Treatment Impacts Ileum Bacterial Community Establishment. *Frontiers in Veterinary*  
449 *Science*, **2**, 56.
- 450 Debelius J, Song SJ, Vazquez-Baeza Y *et al.* (2016) Tiny microbes, enormous impacts: what matters  
451 in gut microbiome studies? *Genome Biology*, **17**, 217.
- 452 DeSantis TZ, Hugenholtz P, Larsen N *et al.* (2006) Greengenes, a chimera-checked 16S rRNA gene  
453 database and workbench compatible with ARB. *Applied and Environmental Microbiology*, **72**,  
454 5069–5072.
- 455 Dewar ML, Arnould JPY, Dann P *et al.* (2013) Interspecific variations in the gastrointestinal  
456 microbiota in penguins. *MicrobiologyOpen*, **2**, 195–204.
- 457 Dewar ML, Arnould JPY, Krause L, Dann P, Smith SC (2014) Interspecific variations in the faecal  
458 microbiota of *Procellariiform* seabirds. *FEMS Microbiology Ecology*, **89**, 47–55.
- 459 Dickinson VM, Duck T, Schwalbe CR, Jarchow JL, Trueblood MH (2001) Nasal and cloacal bacteria  
460 in free-ranging desert tortoises from the western United States. *Journal of Wildlife Diseases*, **37**,  
461 252–257.
- 462 Diedenhofen B, Musch J (2015) Cocor: A comprehensive solution for the statistical comparison of  
463 correlations. *PLOS ONE*, **10**, 1–12.
- 464 van Dongen WF, White J, Brandl HB *et al.* (2013) Age-related differences in the cloacal microbiota  
465 of a wild bird species. *BMC Ecology*, **13**, 11.
- 466 Ewels P, Magnusson M, Lundin S, Källér M (2016) MultiQC: summarize analysis results for multiple  
467 tools and samples in a single report. *Bioinformatics*, **32**, 3047–3048.
- 468 Ezenwa VO, Gerardo NM, Inouye DW, Medina M, Xavier JB (2012) Animal Behavior and the  
469 Microbiome. *Science*, **338**, 198–199.
- 470 Flores GE, Henley JB, Fierer N (2012) A Direct PCR Approach to Accelerate Analyses of Human-  
471 Associated Microbial Communities. *PLOS ONE*, **7**, 1–11.
- 472 Ganz HH, Doroud L, Firl AJ *et al.* (2017) Community-Level Differences in the Microbiome of  
473 Healthy Wild Mallards and Those Infected by Influenza A Viruses. *mSystems*, **2**, e00188-16.
- 474 Herlemann DPR, Labrenz M, Jürgens K *et al.* (2011) Transitions in bacterial communities along the  
475 2000 km salinity gradient of the Baltic Sea. *The ISME Journal*, **5**, 1571–1579.
- 476 Hoar BM, Whiteside DP, Ward L, Inglis G, Morck DW (2007) Evaluation of the enteric microflora of  
477 captive whooping cranes (*Grus americana*) and sandhill cranes (*Grus canadensis*). *Zoo Biology*,  
478 **26**, 141–153.
- 479 Klomp JE, Murphy MT, Smith SB *et al.* (2008) Cloacal microbial communities of female spotted  
480 towhees *Pipilo maculatus*: Microgeographic variation and individual sources of variability.  
481 *Journal of Avian Biology*, **39**, 530–538.
- 482 Koch H, Schmid-Hempel P (2011) Socially transmitted gut microbiota protect bumble bees against an  
483 intestinal parasite. *Proceedings of the National Academy of Sciences of the United States of*  
484 *America*, **108**, 19288–92.
- 485 Kohl KD, Brun A, Magallanes M *et al.* (2017) Gut microbial ecology of lizards: insights into diversity  
486 in the wild, effects of captivity, variation across gut regions and transmission. *Molecular*  
487 *Ecology*, **26**, 1175–1189.

- 488 Kreisinger J, Čížková D, Kropáčková L, Albrecht T (2015) Cloacal Microbiome Structure in a Long-  
489 Distance Migratory Bird Assessed Using Deep 16sRNA Pyrosequencing. *PLOS ONE*, **10**,  
490 e0137401.
- 491 Kulkarni S, Heeb P (2007) Social and sexual behaviours aid transmission of bacteria in birds.  
492 *Behavioural Processes*, **74**, 88–92.
- 493 Lamberski N, Hull AC, Fish AM, Beckmen K, Morishita TY (2003) A survey of the choanal and  
494 cloacal aerobic bacterial flora in free-living and captive red-tailed hawks (*Buteo jamaicensis*)  
495 and Cooper’s hawks (*Accipiter cooperii*). *Journal of Avian Medicine and Surgery*, **17**, 131–135.
- 496 Lobato E, Geraldes M, Melo M, Doutrelant C, Covas R (2017) Diversity and composition of  
497 cultivable gut bacteria in an endemic island bird and its mainland sister species. *Symbiosis*, **71**,  
498 155–164.
- 499 Lombardo MP, Thorpe PA, Cichewicz R *et al.* (1996) Communities of Cloacal Bacteria in Tree  
500 Swallow Families. *The Condor*, **98**, 167–172.
- 501 Love MI, Huber W, Anders S (2014) Moderated estimation of fold change and dispersion for RNA-  
502 seq data with DESeq2. *Genome Biology*, **15**, 550.
- 503 Lucas FS, Heeb P (2005) Environmental factors shape cloacal bacterial assemblages in great tit *Parus*  
504 *major* and blue tit *P. caeruleus* nestlings. *Journal of Avian Biology*, **36**, 510–516.
- 505 Martin MO, Gilman FR, Weiss SL (2010) Sex-specific asymmetry within the cloacal microbiota of  
506 the striped plateau lizard, *Sceloporus virgatus*. *Symbiosis*, **51**, 97–105.
- 507 Matson KD, Versteegh MA, van der Velde M, Tieleman BI (2015) Effects of immune  
508 supplementation and immune challenge on bacterial assemblages in the avian cloaca. *Journal of*  
509 *Ornithology*, **156**, 805–810.
- 510 Maul JD, Gandhi JP, Farris JL (2005) Community-Level Physiological Profiles of Cloacal Microbes  
511 in Songbirds (Order: Passeriformes): Variation Due to Host Species, Host Diet, and Habitat.  
512 *Microbial Ecology*, **50**, 19–28.
- 513 McMurdie PJ, Holmes S (2013) phyloseq: An R Package for Reproducible Interactive Analysis and  
514 Graphics of Microbiome Census Data. *PLOS ONE*, **8**, e61217.
- 515 McMurdie PJ, Holmes S (2014) Waste Not, Want Not: Why Rarefying Microbiome Data Is  
516 Inadmissible. *PLOS Computational Biology*, **10**, e1003531.
- 517 Merkevičienė L, Ruzauskaitė N, Klimienė I *et al.* (2017) Microbiome and antimicrobial resistance  
518 genes in microbiota of cloacal samples from European herring gulls (*Larus argentatus*). *Journal*  
519 *of Veterinary Research*, **61**, 27–35.
- 520 Mills TK, Lombardo MP, Thorpe PA (1999) Microbial colonization of the cloacae of nestling Tree  
521 Swallows. *The Auk*, **116**, 947–956.
- 522 Moreno J, Briones V, Merino S *et al.* (2003) Beneficial Effects of Cloacal Bacteria on Growth and  
523 Fledging Size in Nestling Pied Flycatchers (*Ficedula Hypoleuca*) in Spain. *The Auk*, **120**, 784–  
524 790.
- 525 Muegge BD, Kuczynski J, Knights D *et al.* (2011) Diet Drives Convergence in Gut Microbiome  
526 Functions Across Mammalian Phylogeny and Within Humans. *Science*, **332**, 970–974.
- 527 Oksanen J, Blanchet FG, Friendly M *et al.* (2017) Vegan: Community Ecology Package. *R package*  
528 *version 2.4-2*. <https://cran.r-project.org/package=vegan>
- 529 R Core Team (2017) R: A language and environment for statistical computing. *R Foundation for*



- 530 *Statistical Computing, Vienna, Austria.*
- 531 Ruiz-Rodríguez M, Lucas FS, Heeb P, Soler JJ (2009a) Differences in intestinal microbiota between  
532 avian brood parasites and their hosts. *Biological Journal of the Linnean Society*, **96**, 406–414.
- 533 Ruiz-Rodríguez M, Soler JJ, Lucas FS *et al.* (2009b) Bacterial diversity at the cloaca relates to an  
534 immune response in magpie *Pica pica* and to body condition of great spotted cuckoo *Clamator*  
535 *glandarius* nestlings. *Journal of Avian Biology*, **40**, 42–48.
- 536 Santoro M, Hernández G, Caballero M (2006) Aerobic bacterial flora of nesting green turtles  
537 (*Chelonia mydas*) from Tortuguero National Park, Costa Rica. *Journal of Zoo and Wildlife*  
538 *Medicine*, **37**, 549–552.
- 539 Santos SS, Pardal S, Proença DN *et al.* (2012) Diversity of cloacal microbial community in migratory  
540 shorebirds that use the Tagus estuary as stopover habitat and their potential to harbor and  
541 disperse pathogenic microorganisms. *FEMS Microbiology Ecology*, **82**, 63–74.
- 542 Schaffner T, Mueller J, Hess MW *et al.* (1974) The Bursa of Fabricius: A Central Organ Providing for  
543 Contact between the Lymphoid System and Intestinal Content. *Cellular Immunology*, **13**, 304–  
544 312.
- 545 Sekirov I, Russell S, Antunes L (2010) Gut microbiota in health and disease. *Physiological Reviews*,  
546 **90**, 859–904.
- 547 Sharon G, Segal D, Ringo JM *et al.* (2010) Commensal bacteria play a role in mating preference of  
548 *Drosophila melanogaster*. *Proceedings of the National Academy of Sciences of the United States*  
549 *of America*, **107**, 20051–20056.
- 550 Smith P, Willemsen D, Popkes M *et al.* (2017) Regulation of Life Span by the Gut Microbiota in The  
551 Short-Lived African Turquoise Killifish. *bioRxiv*. doi: 10.1101/120980.
- 552 Song SJ, Amir A, Metcalf JL *et al.* (2016) Preservation Methods Differ in Fecal Microbiome  
553 Stability, Affecting Suitability for Field Studies. *mSystems*, **1**, e00021-16.
- 554 Stanley D, Geier MS, Chen H, Hughes RJ, Moore RJ (2015) Comparison of fecal and cecal  
555 microbiotas reveals qualitative similarities but quantitative differences. *BMC Microbiology*, **15**,  
556 51.
- 557 Stenkat J, Krautwald-Junghanns ME, Schmitz Ornés A, Eilers A, Schmidt V (2014) Aerobic cloacal  
558 and pharyngeal bacterial flora in six species of free-living birds. *Journal of Applied*  
559 *Microbiology*, **117**, 1564–1571.
- 560 Warner NL, Szenberg A (1964) The Immunological Function of the Bursa of Fabricius in the  
561 Chicken. *Annual Review of Microbiology*, **18**, 253–266.
- 562 De Weirdt R, Van de Wiele T (2015) Micromanagement in the gut: microenvironmental factors  
563 govern colon mucosal biofilm structure and functionality. *npj Biofilms and Microbiomes*, **1**,  
564 15026.
- 565 White J, Mirleau P, Danchin E *et al.* (2010) Sexually transmitted bacteria affect female cloacal  
566 assemblages in a wild bird. *Ecology Letters*, **13**, 1515–1524.
- 567 Wickham H (2009) *ggplot2: elegant graphics for data analysis*. New York: Springer.
- 568 Xenoulis PG, Gray PL, Brightsmith D *et al.* (2010) Molecular characterization of the cloacal  
569 microbiota of wild and captive parrots. *Veterinary Microbiology*, **146**, 320–325.
- 570 Zhang Y, Simon SE, Johnson JA, Allen MS (2017) Spatial Microbial Composition Along the  
571 Gastrointestinal Tract of Captive Attwater's Prairie Chicken. *Microbial Ecology*, **73**, 966–977.

572 **Supporting information**

573

574

575 Supporting information has been made available online.

576

577 **Appendix S1.** Supplementary Methods, Supplementary Figures S1–S4, Supplementary Tables S1–  
578 S3, and Supplementary References.

579 **Appendix S2.** Supplementary Tables S4–S9.

## 580 Figures

581

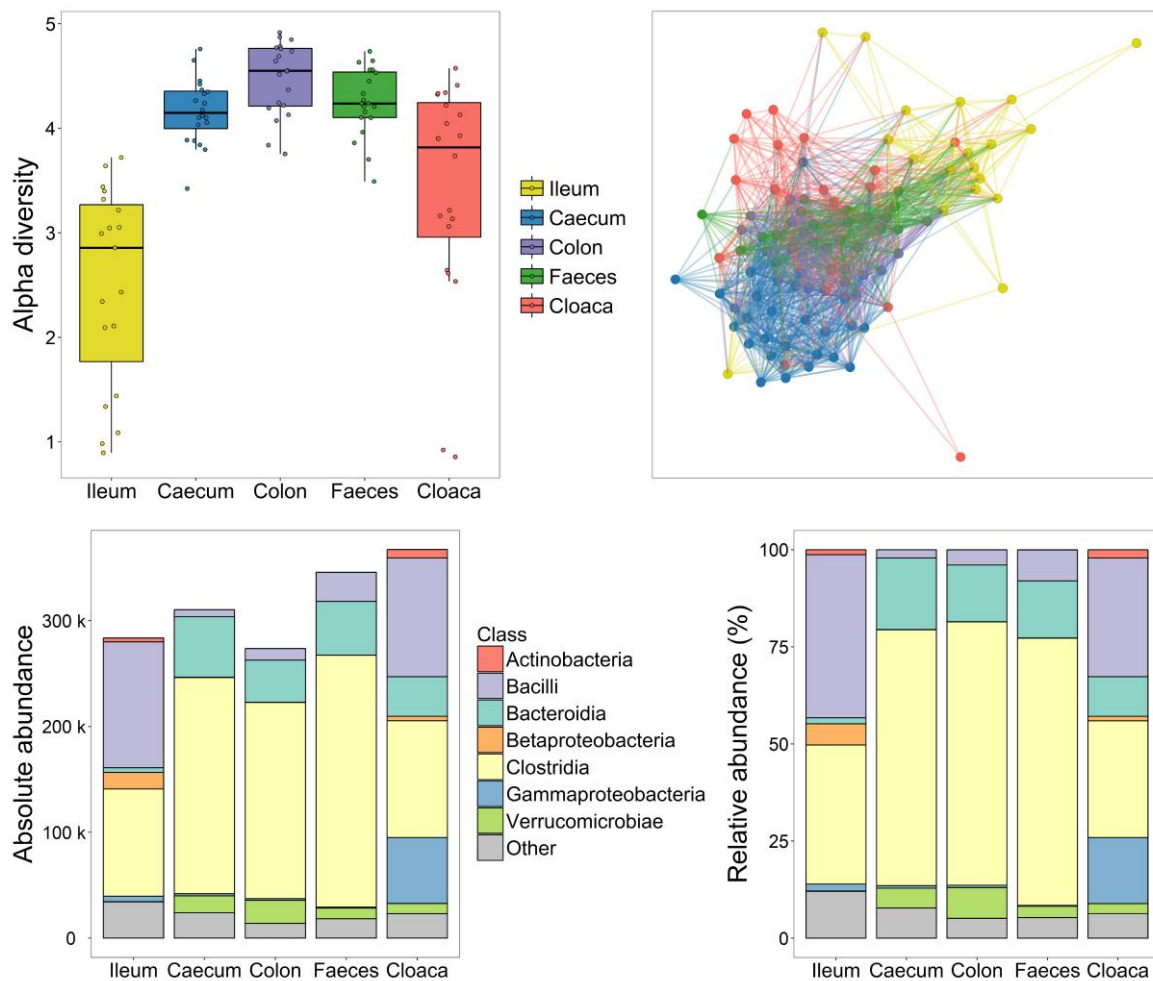

582

583

584 **Figure 1.** Overall microbiota similarities and differences between sample types. (A) Boxplot of  
585 Shannon alpha diversity within sample types. (B) Network of Bray-Curtis distances between samples  
586 where colours indicate sample type and lines are drawn to nearest neighbours with a maximum  
587 distance of 0.85. The barplots show the (C) absolute and (D) relative abundance of all OTUs for each  
588 sample type. Taxonomic classifications are coloured at the class level.

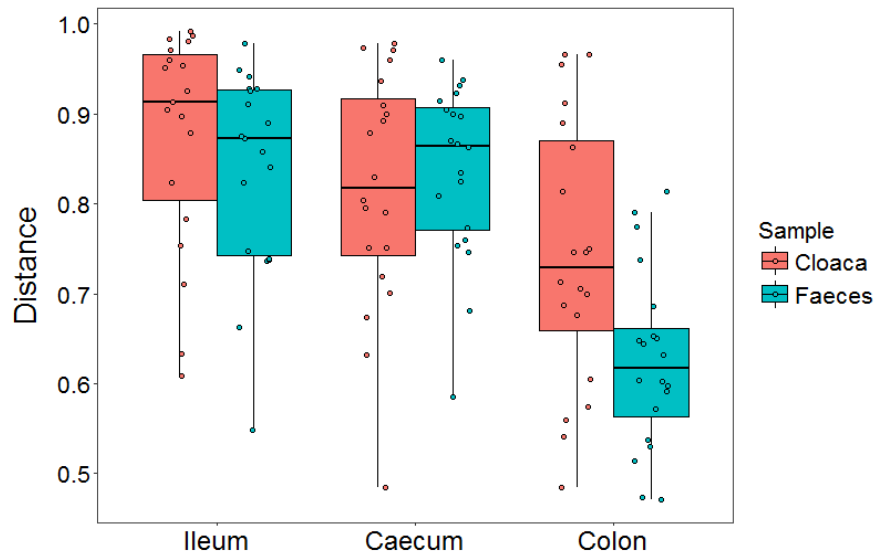

589

590

591 **Figure 2.** Bray-Curtis distances between the microbiota in cloacal and faecal samples compared to the  
592 microbiota in three parts of the gut (ileum, caecum, colon) within the same host individual. Higher  
593 distance measures indicate higher dissimilarity, where 1 = completely dissimilar bacterial community.

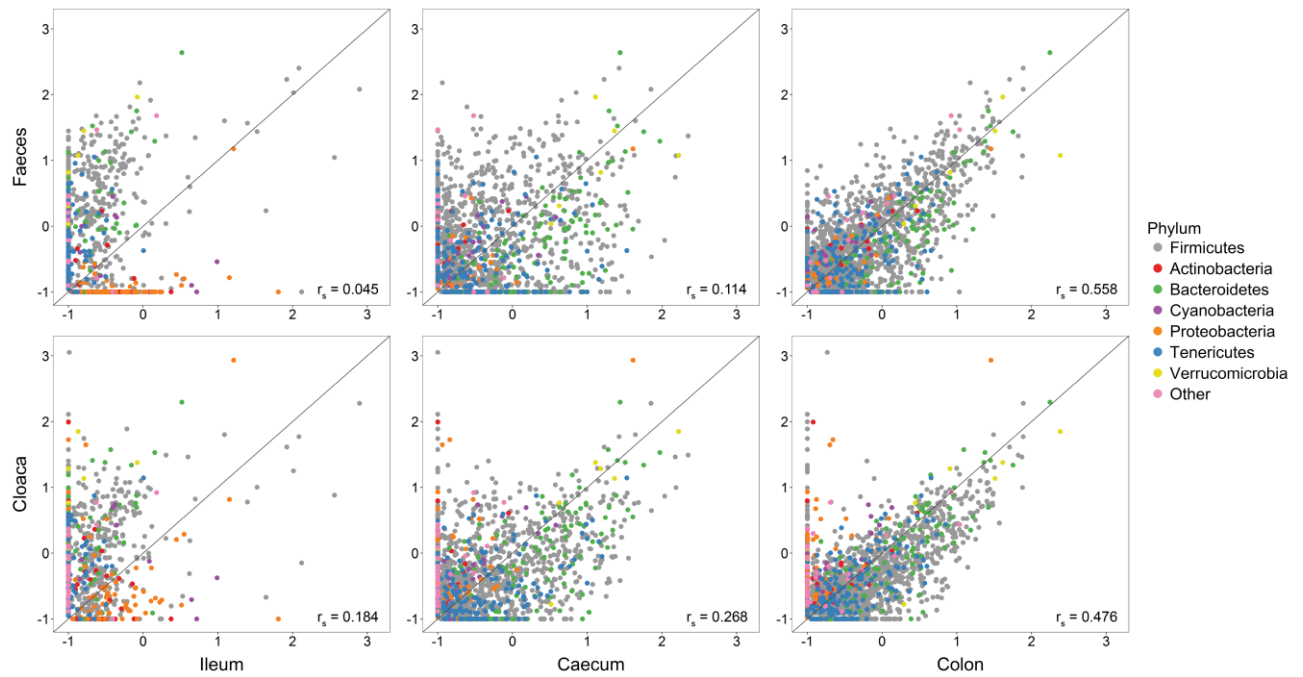

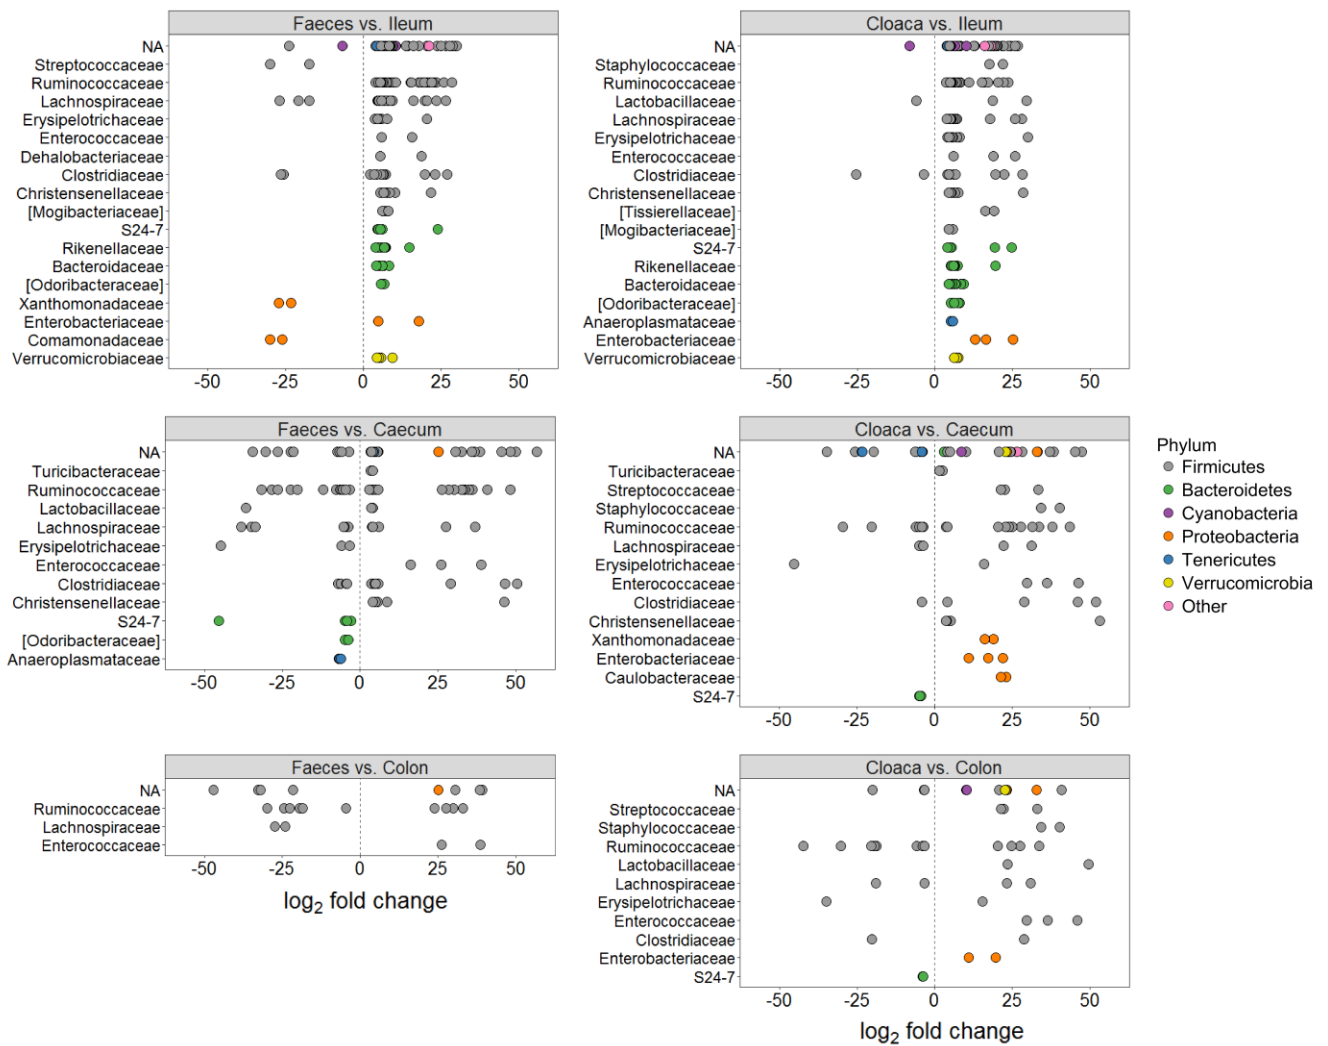

602

603

604 **Figure 4.** OTUs that were significantly different in abundance in the sampling methods (faeces and  
 605 cloaca) relative to three parts of the gut (ileum, caecum, and faeces). The y-axes show taxonomic  
 606 families and all OTUs have been coloured within their respective phylum. Positive log<sub>2</sub> fold changes  
 607 signify increased OTU abundance in either faeces (left column) or cloacal swabs (right column), and  
 608 negative log<sub>2</sub> fold changes display increased abundance in one of the gut sections (ileum, caecum, or  
 609 colon). Families with only a single significant OTU are not shown due to space limitations; complete  
 610 dataset can be found at Tables S4-S9. Family names in brackets are proposed taxonomies by  
 611 Greengenes.
